# Supplementary material for: Cytotoxic T lymphocyte lysis of HTLV-1 infected cells is limited by weak HBZ protein expression, but non-specifically enhanced on induction of Tax expression
Source: PubMed Central journal article supplement (PMC4282740; doi:10.1186/s12977-014-0116-6), 2014-12-14
Supplement: 12977_2014_116_MOESM6_ESM.pdf [file 12977_2014_116_MOESM6_ESM.pdf]

# Donor characteristics

| Donor | Experiment          | Figure(s) | Genotype            | PVL (%PBMC) | Age | Sex | Clinical status |
|-------|---------------------|-----------|---------------------|-------------|-----|-----|-----------------|
| HAI   | timecourse          | 1         | HLA-A*02-           | 17.12       | 74  | F   | Asymptomatic    |
| HGP   | timecourse          | 1         | HLA-A*0201+         | 2.48        | 41  | F   | Asymptomatic    |
| TCF   | timecourse          | 1         | HLA-A*02-           | 5.49        | 56  | F   | HAM/TSP         |
| TCY   | timecourse          | 1         | HLA-A*0201+         | 8.97        | 55  | F   | HAM/TSP         |
| HES   | ICAM sort           | 1         | HLA-A*02-           | 19.81       | 70  | F   | Asymptomatic    |
| HHL   | ICAM sort           | 1         | HLA-A*0201+         | 20.99       | 25  | F   | Asymptomatic    |
| TBP   | ICAM sort           | 1         | HLA-A*02-           | 19.52       | 73  | M   | HAM/TSP         |
| TCH   | ICAM sort           | 1         | HLA-A*02-           | 10.36       | 61  | F   | HAM/TSP         |
| TCK   | ICAM sort           | 1         | HLA-A*02-           | 6.50        | 64  | F   | HAM/TSP         |
| TW    | ICAM sort           | 1         | HLA-A*02-           | 18.21       | 46  | F   | HAM/TSP         |
| HBT   | Lysis by HTLV CTL   | 2,6,7     | HLA-A*0201+         | 1.07        | 72  | F   | Asymptomatic    |
| HCM   | Lysis by HTLV CTL   | 2,6,7     | HLA-A*0201+         | 0.54        | 53  | F   | Asymptomatic    |
| HDB   | Lysis by HTLV CTL   | 2,6,7     | HLA-A*0201+         | 1.20        | 54  | F   | Asymptomatic    |
| HDS   | Lysis by HTLV CTL   | 2,6,7     | HLA-A*0201++        | 7.39        | 61  | F   | Asymptomatic    |
| HEI   | Lysis by HTLV CTL   | 2,6,7     | HLA-A*0201+, *0205+ | 3.98        | 34  | F   | Asymptomatic    |
| HEZ   | Lysis by HTLV CTL   | 2,6,7     | HLA-A*0201+, *0202+ | 14.69       | 55  | F   | Asymptomatic    |
| HFG   | Lysis by HTLV CTL   | 2,6,7     | HLA-A*0201+         | 6.57        | 61  | F   | Asymptomatic    |
| P4    | Lysis by HTLV CTL   | 2,6,7     | HLA-A*0201+         | 21.61       | 70  | F   | Polymyositis    |
| TAA   | Lysis by HTLV CTL   | 2,6,7     | HLA-A*0201+         | 8.41        | 72  | F   | HAM/TSP         |
| TAC   | Lysis by HTLV CTL   | 2,6,7     | HLA-A*0201++        | 20.24       | 66  | F   | HAM/TSP         |
| TAQ   | Lysis by HTLV CTL   | 2,6,7     | HLA-A*0201+         | 6.91        | 84  | M   | HAM/TSP         |
| TAT   | Lysis by HTLV CTL   | 2,6,7     | HLA-A*0201+         | 11.42       | 76  | F   | HAM/TSP         |
| TBW   | Lysis by HTLV CTL   | 2,6,7     | HLA-A*0201+         | 26.71       | 68  | M   | HAM/TSP         |
| TCO   | Lysis by HTLV CTL   | 2,6,7     | HLA-A*0201+         | 10.12       | 57  | F   | HAM/TSP         |
| TCY   | Lysis by HTLV CTL   | 2,6,7     | HLA-A*0201+         | 8.97        | 54  | F   | HAM/TSP         |
| U1    | apoptosis induction | 3         | not tested          | 0           | 30  | F   | Uninfected      |
| U2    | apoptosis induction | 3         | not tested          | 0           | 33  | F   | Uninfected      |
| U3    | apoptosis induction | 3         | not tested          | 0           | 41  | F   | Uninfected      |
| U4    | apoptosis induction | 3         | not tested          | 0           | 42  | M   | Uninfected      |
| U5    | apoptosis induction | 3         | not tested          | 0           | 37  | F   | Uninfected      |
| U6    | apoptosis induction | 3         | not tested          | 0           | 76  | M   | Uninfected      |
| HBE   | apoptosis induction | 3         | HLA-A*0205+         | 12.69       | 77  | F   | Asymptomatic    |
| HBX   | apoptosis induction | 3         | HLA-A*02-           | 7.69        | 56  | F   | Asymptomatic    |
| HDR   | apoptosis induction | 3         | HLA-A*02-           | 1.73        | 35  | F   | Asymptomatic    |
| HFE   | apoptosis induction | 3         | HLA-A*0205+         | 13.27       | 68  | F   | Asymptomatic    |
| TDO   | apoptosis induction | 3         | not tested          | 0.49        | 46  | F   | HAM/TSP         |
| TDT   | apoptosis induction | 3         | HLA-A*02-           | 8.82        | 41  | F   | HAM/TSP         |
| TDZ   | apoptosis induction | 3         | not tested          | 19.37       | 55  | F   | HAM/TSP         |
| TW    | apoptosis induction | 3         | HLA-A*02-           | 18.21       | 44  | F   | HAM/TSP         |
| UV1   | apoptosis induction | 3         | HLA-A*02-           | 2.17        | 85  | F   | Uveitis         |
| HBL   | Lysis by EBV CTL    | 4         | HLA-A*0201+         | 1.48        | 21  | F   | Asymptomatic    |
| HEZ   | Lysis by EBV CTL    | 4         | HLA-A*0201+         | 14.69       | 57  | F   | Asymptomatic    |
| P4    | Lysis by EBV CTL    | 4         | HLA-A*0201+         | 21.61       | 70  | F   | Polymyositis    |
| TAQ   | Lysis by EBV CTL    | 4         | HLA-A*0201+         | 6.91        | 83  | M   | HAM/TSP         |
| TCO   | Lysis by EBV CTL    | 4         | HLA-A*0201+         | 10.12       | 56  | F   | HAM/TSP         |
| TCY   | Lysis by EBV CTL    | 4         | HLA-A*0201+         | 8.97        | 55  | F   | HAM/TSP         |

HLA-A\*02- denotes that no HLA-A\*02 alleles were detected. Where HLA-A\*02 alleles were detected, the high resolution genotype is specified. + = single copy of the allele, ++ = two copies
