# Supplementary material for: Cytotoxic T lymphocyte lysis of HTLV-1 infected cells is limited by weak HBZ protein expression, but non-specifically enhanced on induction of Tax expression
Source: PubMed Central journal article supplement (PMC4282740; doi:10.1186/s12977-014-0116-6), 2014-12-14
Supplement: 12977_2014_116_MOESM8_ESM.pdf [file 12977_2014_116_MOESM8_ESM.pdf]

# Gating strategy apoptosis assay

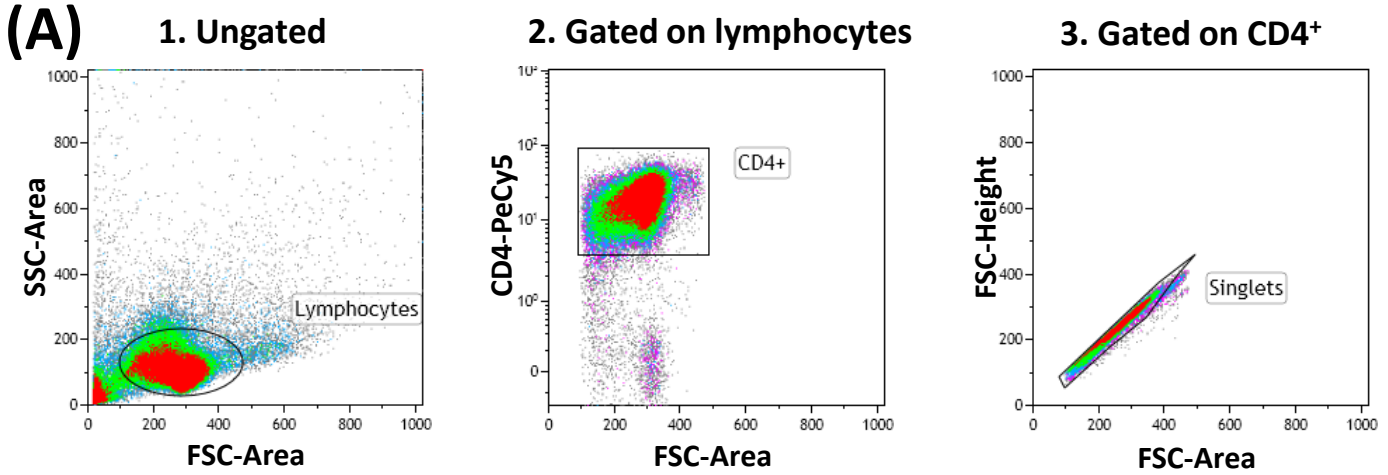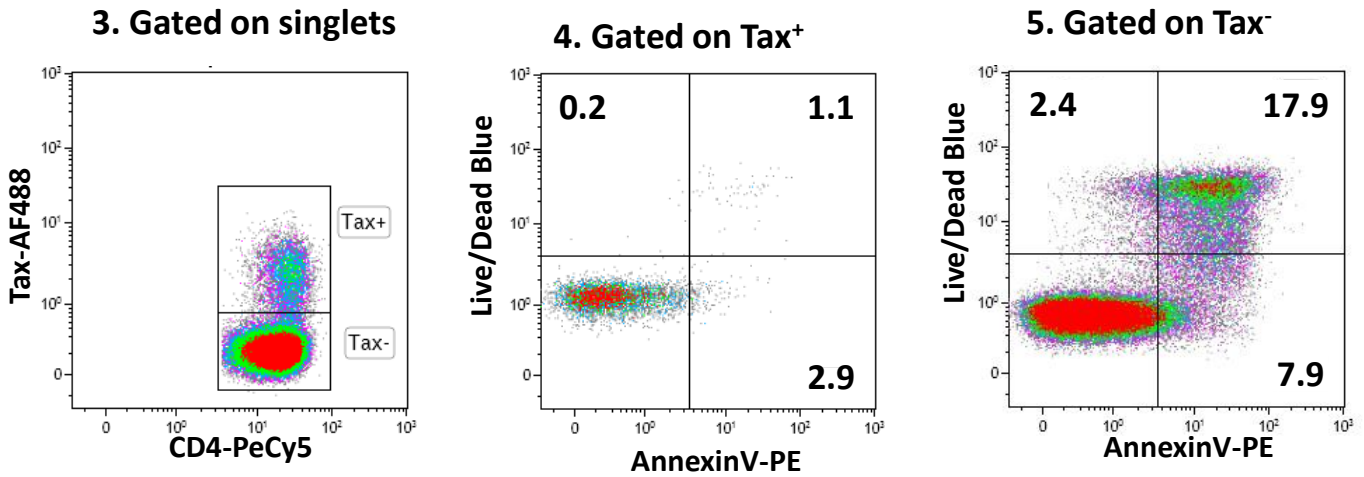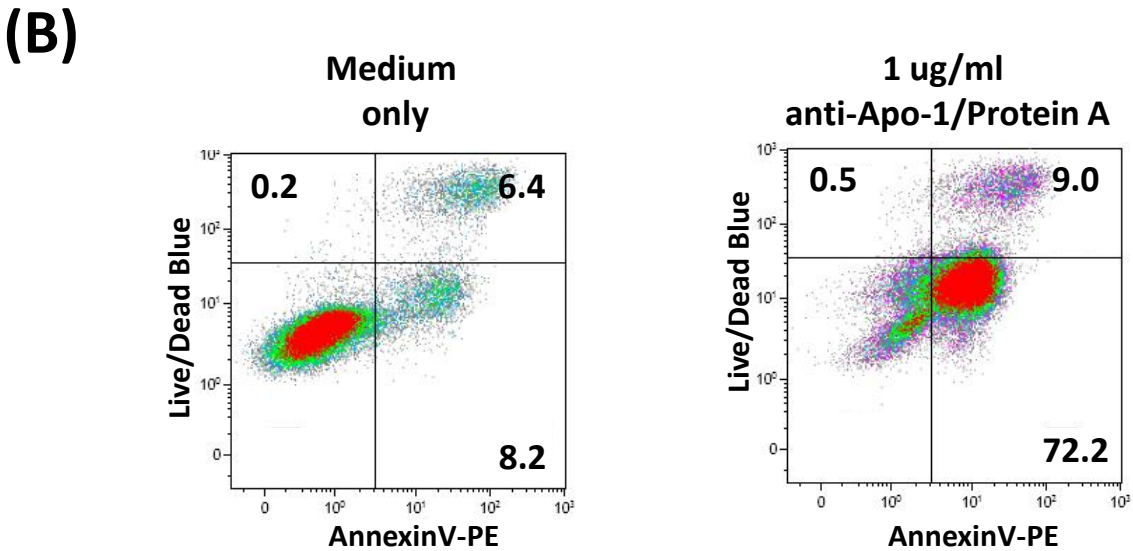

All methods and further information can be found in the legend for figure 3.
